# Supplementary material for: Safety in law – legal bases for safety-related decisions on technology in Germany: hazard, risk, residual risk and best-possible safety in nuclear disposal
Source: Copernicus journal article supplement (doi:10.5194/sand-2-265-2023), 2023-09-06

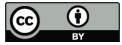

*Supplement of*

**Safety in law – legal bases for safety-related decisions on technology in Germany: hazard, risk, residual risk and best-possible safety in nuclear disposal**

**Florian Emanuel**

*Correspondence to:* Florian Emanuel ([florian.emanuel@base.bund.de](mailto:florian.emanuel@base.bund.de))

The copyright of individual parts of the supplement might differ from the article licence.

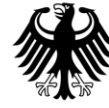

Federal Office  
for the Safety of  
Nuclear Waste Management

# **Risk & Safety in law**

**Legal Bases for safety-related Decisions on Technology  
in Germany**

Dr. Florian Emanuel, LL.M., LL.M.

Legal Counsel & Deputy Head of Division

Division A 4: Enforcement of the Site Selection Procedure, Mining Supervision

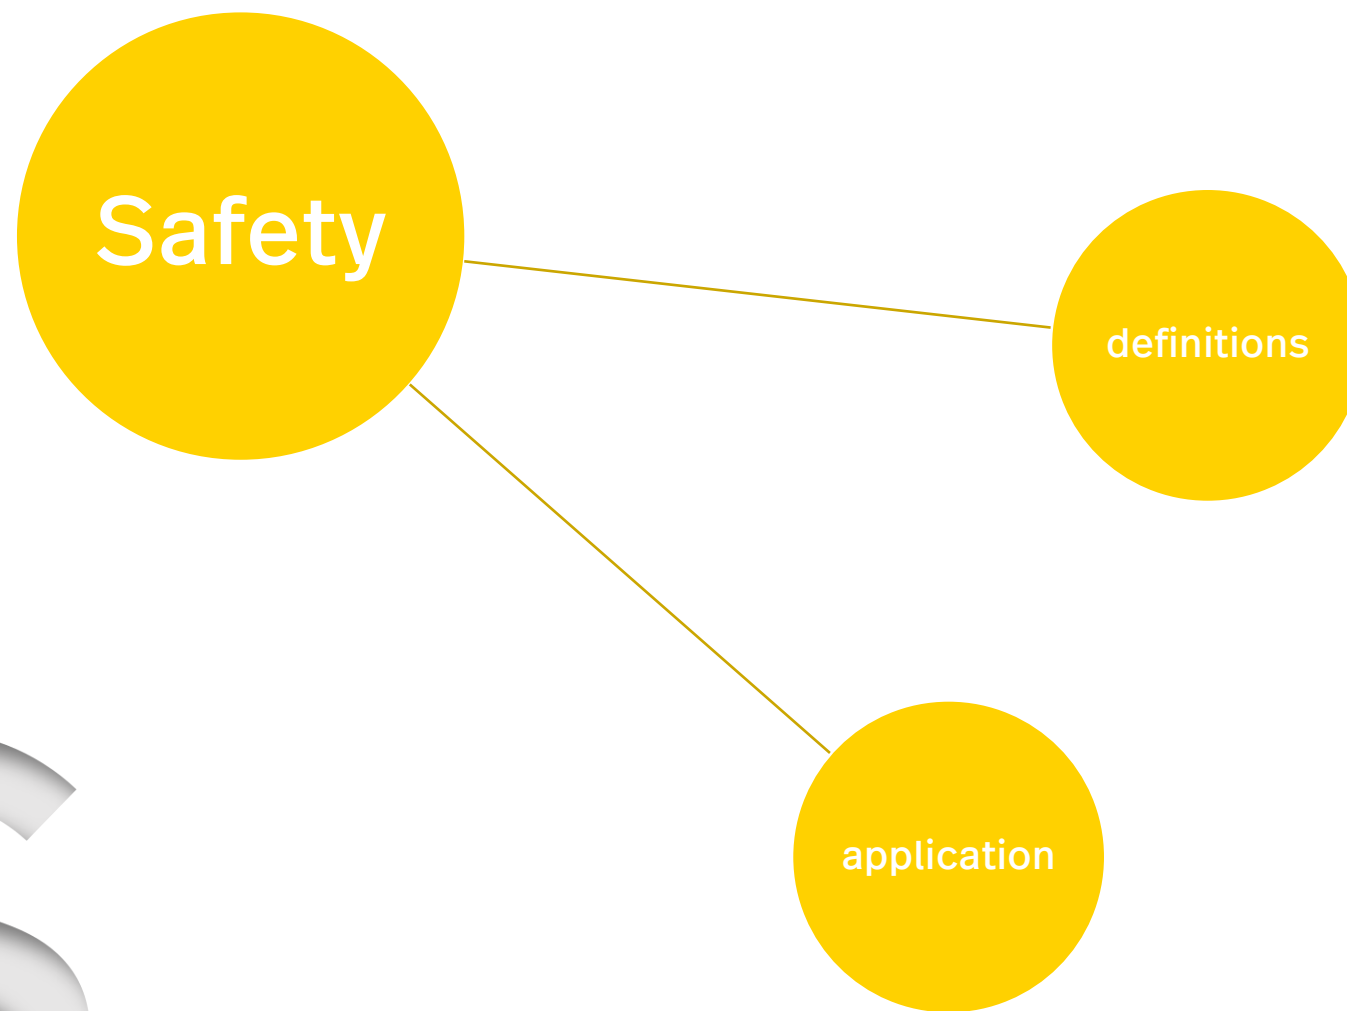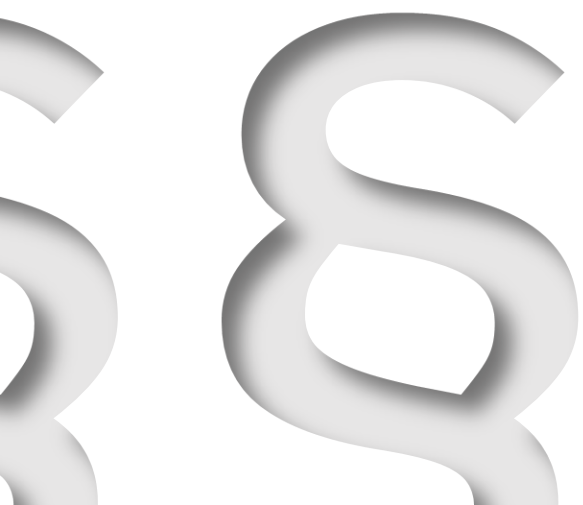

# Definitions are important (not only in law).

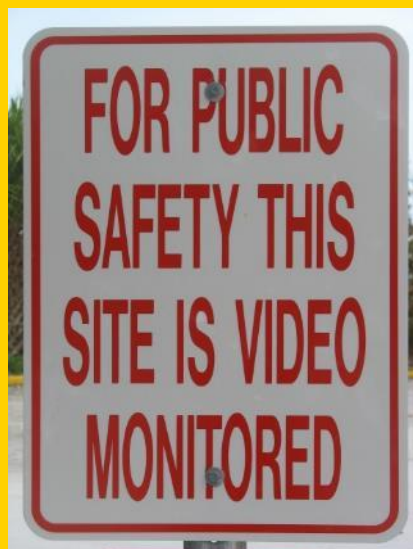

**BEACH WARNING FLAGS**  
BANDERAS DE ADVERTENCIA EN LA PLAYA

-  **Water Closed to Public**  
Agua Cerrada al Público
-  **High Hazard**  
High Surf and/or Strong Currents  
Peligro Alto, Resaca Alta y/o Corrientes Fuertes
-  **Medium Hazard**  
Moderate Surf and/or Currents  
Peligro Medio, Resaca Moderada y/o Corrientes Fuertes
-  **Low Hazard**  
Calm Conditions, Exercise Caution  
Peligro Bajo, Condiciones Calmas, Tenga Cuidado
-  **Dangerous Marine Life**  
Vida Marina Peligrosa

Absence of Flags Does Not Assure Safe Waters  
La Ausencia de Banderas No Asegura Aguas Seguras

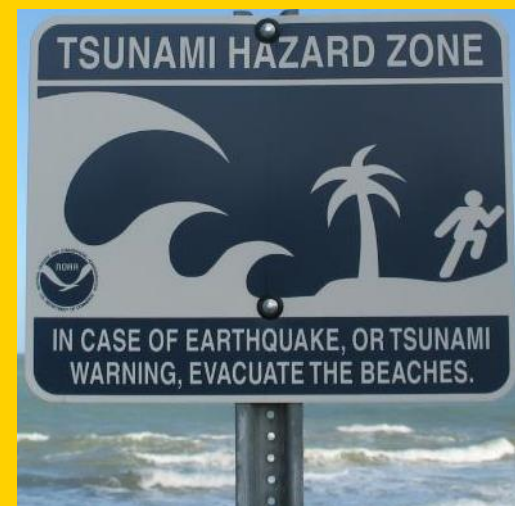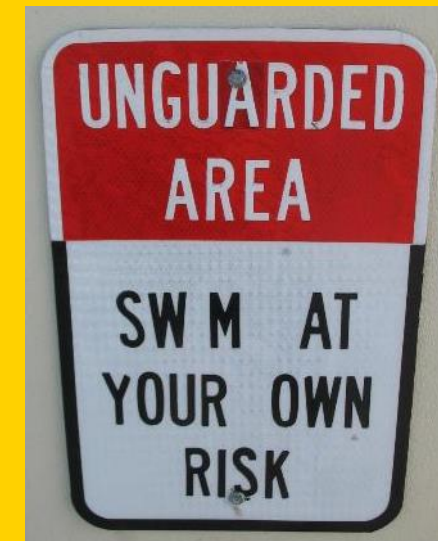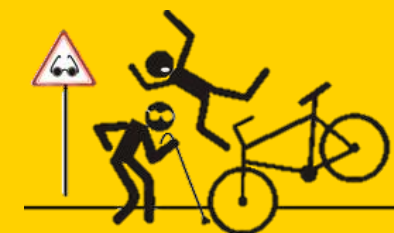

# **A technically unambiguous definition is possible.**

- Safety = zero risk
- Value-free scientific-technical term

# **There is no common interdisciplinary & legal definition.**

- undefined legal term
  - need for interpretation in every legal area
- central component of environmental and technical law
- interface between technical (natural) sciences and humanities
- no interdisciplinary definition

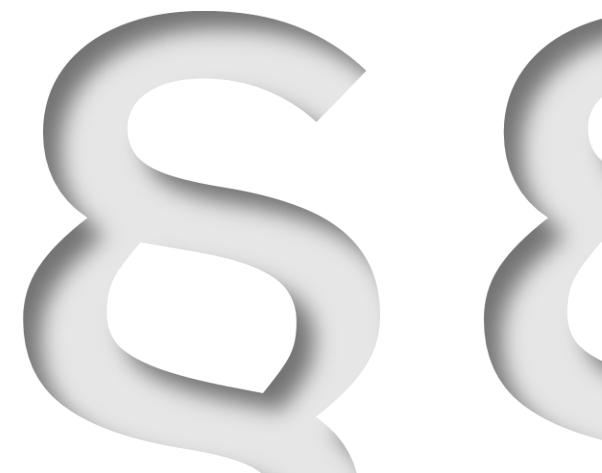

# Classification leads to legal consequences.

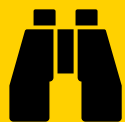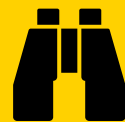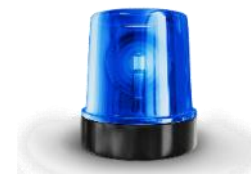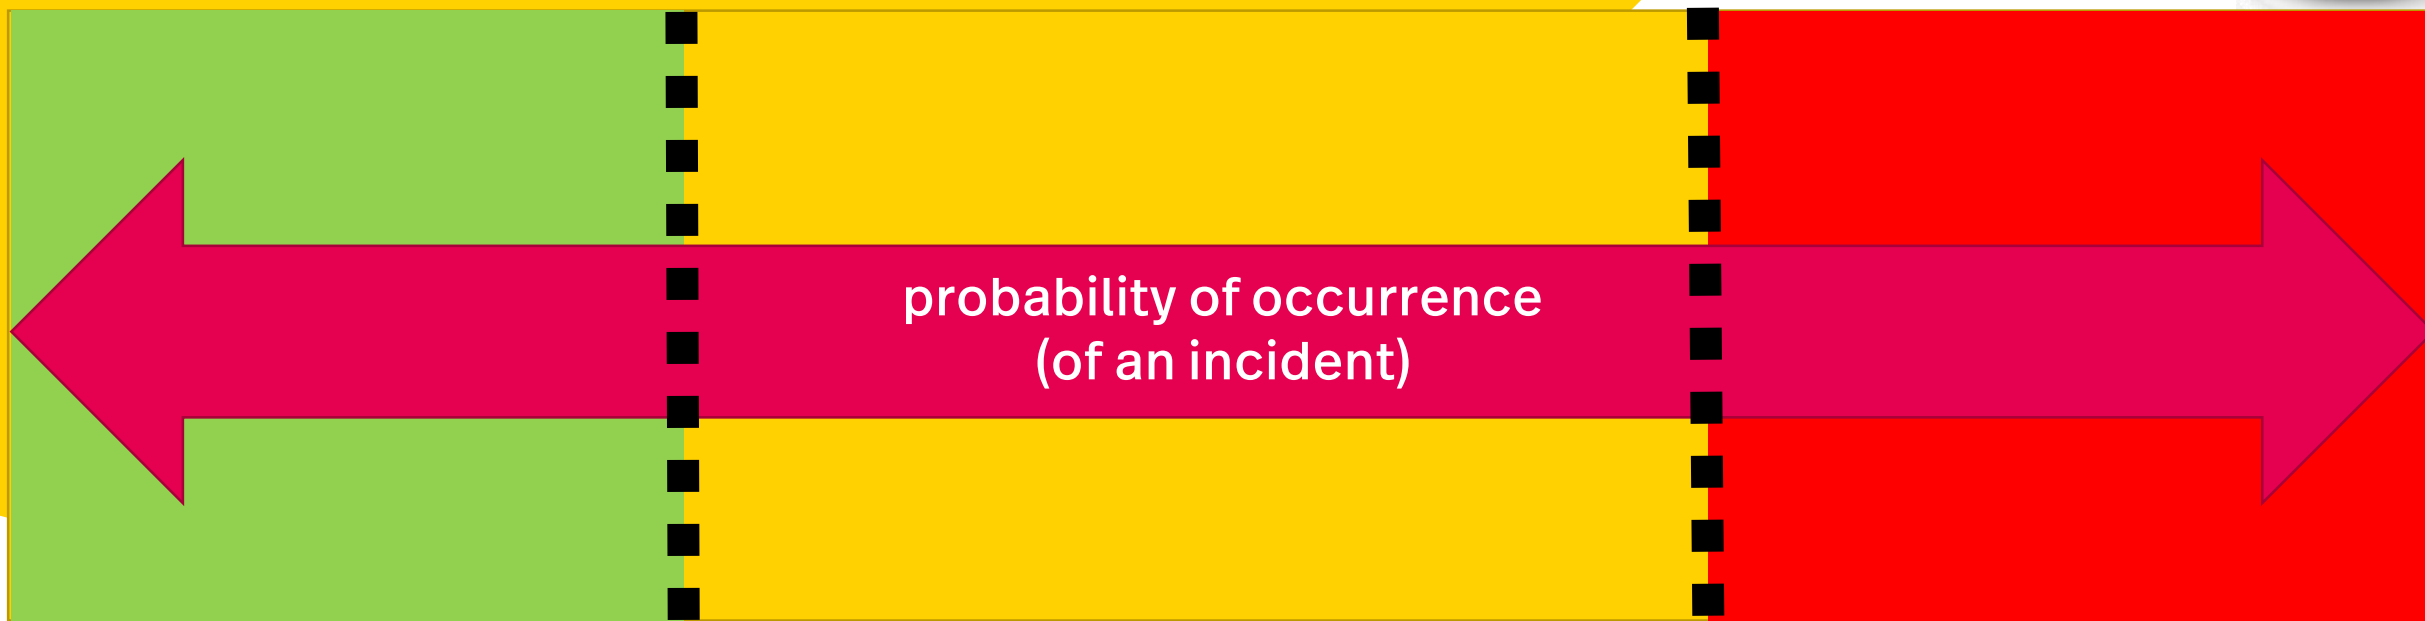

residual risk

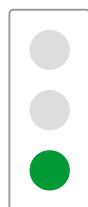

risk

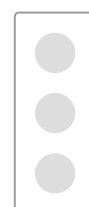

hazard

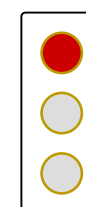

# Risk regulation is implemented in several fields of life.

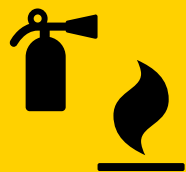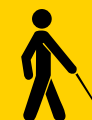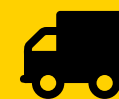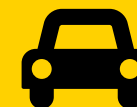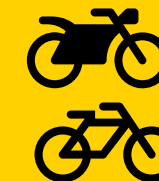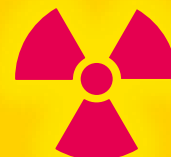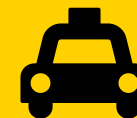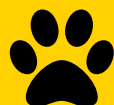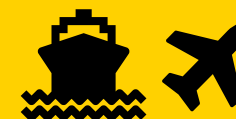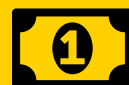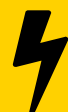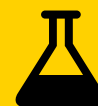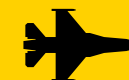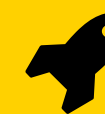



# The Site Selection Process follows a phase-based approach.

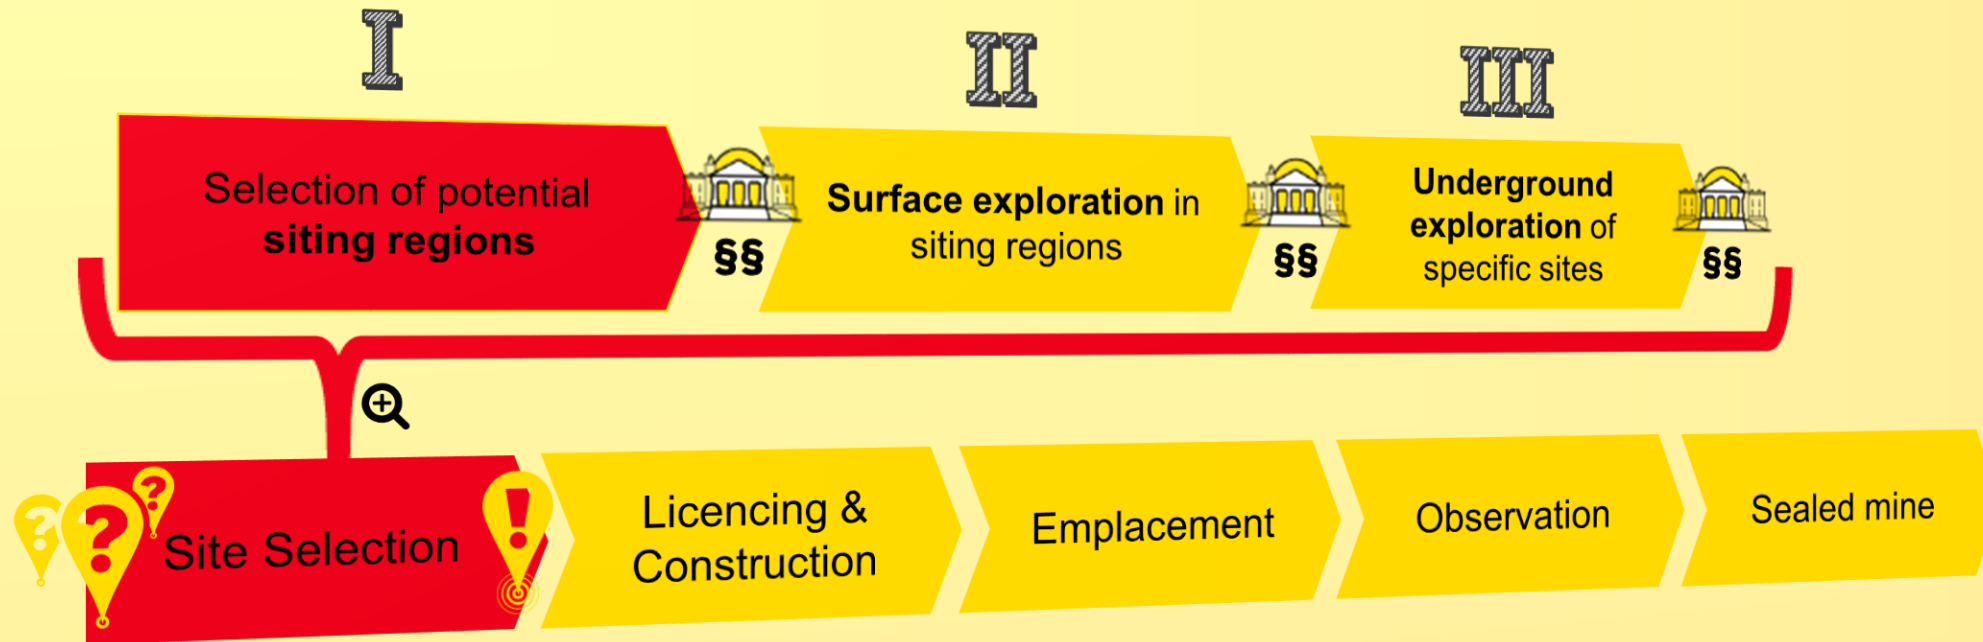

# The Site Selection Process is guided by basic principles & characteristics.

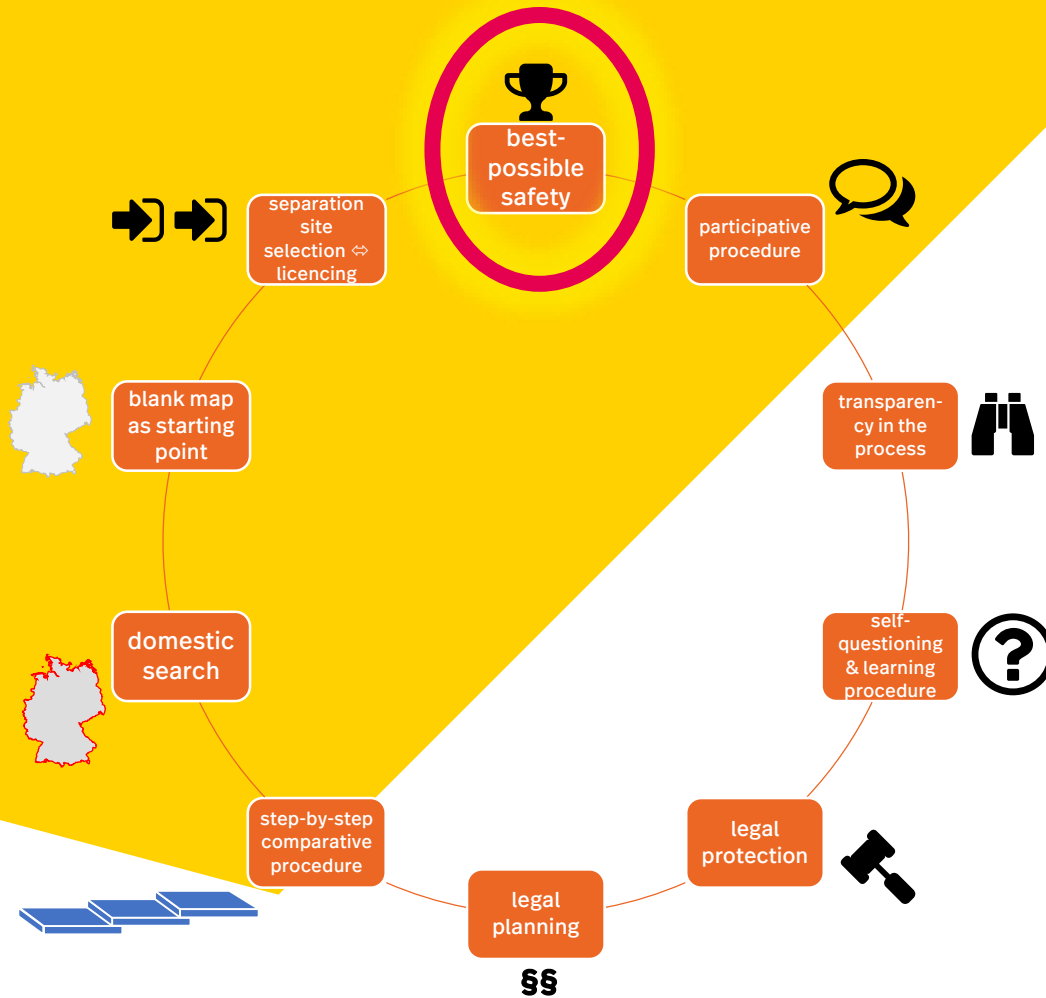

# The best-possible safety (I/III)

## § 1 (2) StandAG (Site Selection Act)

The purpose of the site selection procedure is to identify [...] a site for the disposal of high-level radioactive waste [...] with the best possible safety for a disposal facility [...].

The site with the best possible safety is

- the site identified on the basis of a **comparative procedure** from among the suitable sites in the respective phase [...]
- ensuring the best possible safety for the **long-term protection** of man and the environment against ionising radiation and other harmful effects of such waste for a period of one million years.

# The best-possible safety (II/III)

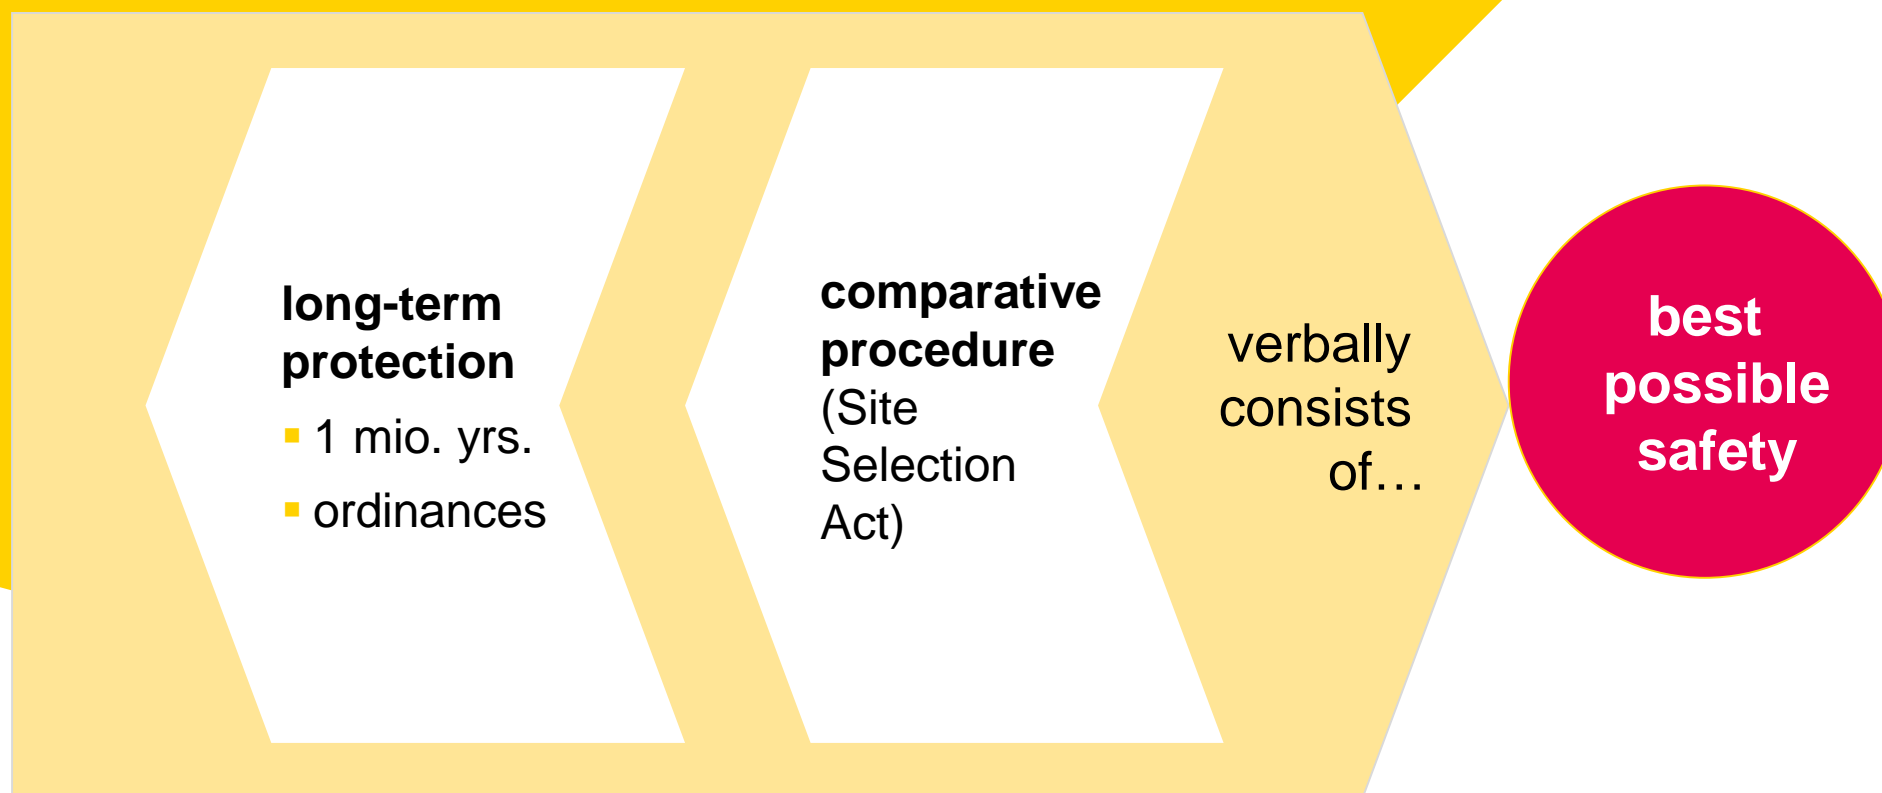

# The best-possible safety (III/III)

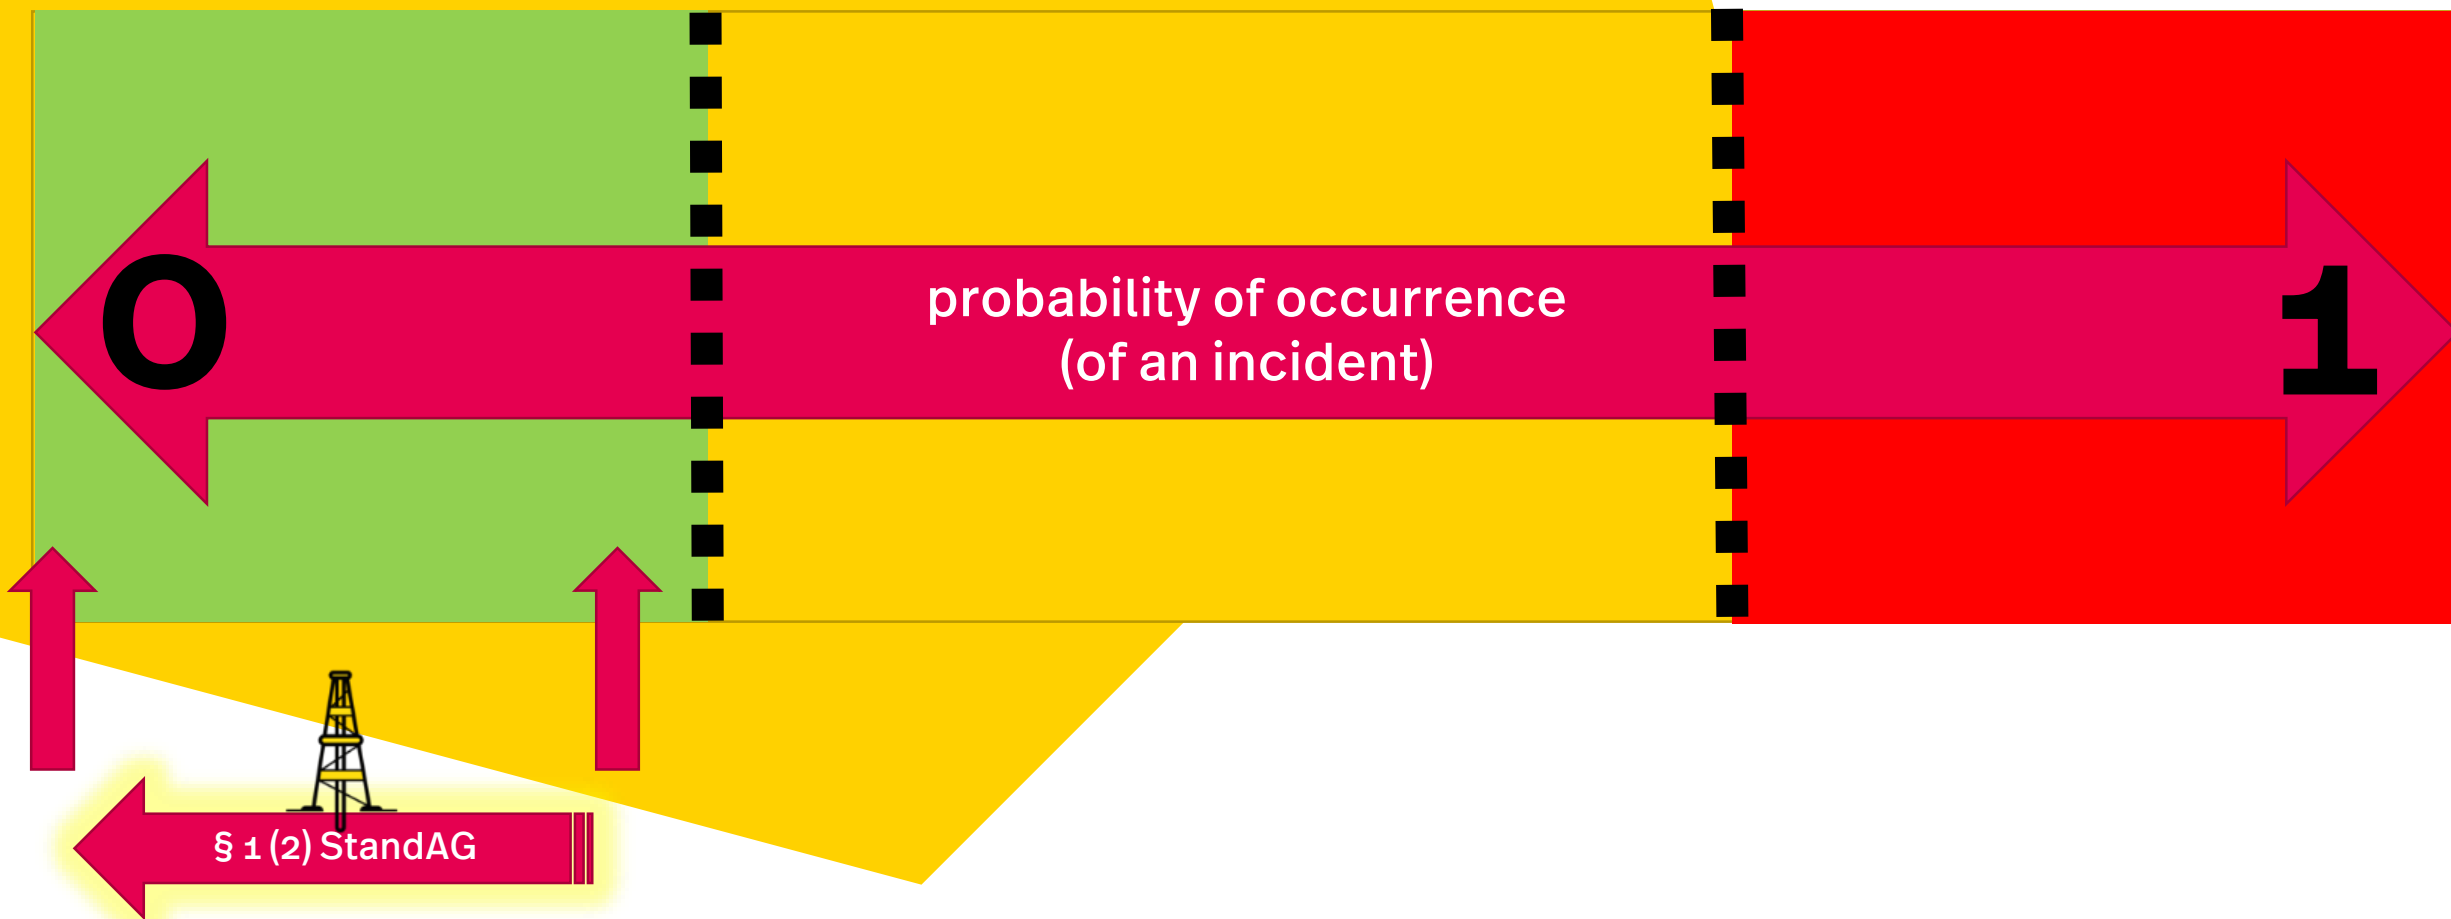

# References

- Federal Constitutional Court (Bundesverfassungsgericht),  
Decision 2 BvL 8/77 (Kalkar I), 1978/8/8, BVerfGE 49, 89
- Federal Constitutional Court (Bundesverfassungsgericht),  
Decision 1 BvR 385/77 (Mülheim-Kärlich), 1979/12/20, BVerfGE 53, 30

# Contact

## Federal Office for the Safety of Nuclear Waste Management (Bundesamt für die Sicherheit der nuklearen Entsorgung – BASE)

Wegelystraße 8  
DE 10623 Berlin  
Germany

Phone: +49 – 30 – 4321 – 0

Email: [info@base.bund.de](mailto:info@base.bund.de)

Web: [www.base.bund.de/EN](http://www.base.bund.de/EN)

Info platform: [www.endlagersuche-infoplattform.de](http://www.endlagersuche-infoplattform.de)

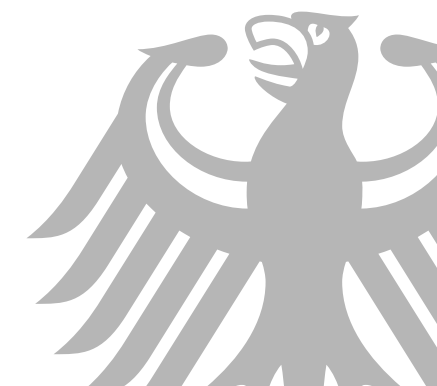

Supplement: Supplementary file 1 [file sand-2-265-2023-supplement.pdf]
